# Supplementary material for: Postoperative intussusception: a rare but critical complication in adult patients with Crohn’s disease – case report and literature review
Source: PubMed Central journal article supplement (PMC10576550; doi:10.1515/iss-2023-0012), 2023-10-06
Supplement: j_iss-2023-0012_suppl_001.pdf [file j_iss-2023-0012_suppl_001.pdf]

## Reviewer Assessment

# S. M. Eschlböck et al.: Postoperative intussusception: a rare but critical complication in adult patients with Crohn's disease - Case report and literature review

## Reviewers' Comments to Original Submission

### Reviewer 1: Schiedeck, Thomas

Date received: 24-May-2023

Reviewer recommendation: **Accept in present form**

Reviewer overall scoring: **Medium**

#### Comments to author:

The presented case-report is a very good example for these rare postoperative complication. Handling of the situation and treatment was very concise and is appropriate to spread the knowledge about invagination and intussusception. I would suggest to publish the contribution in the presented form without any further correction.

### Reviewer 2: anonymous

Date received: 10-Jul-2023

Reviewer recommendation: **Accept in present form**

Reviewer overall scoring: **Medium**

#### Comments to author:

Nice presentation of a rare, but significant complication in surgery for Crohn's disease. The readers of the article get relevant information about this complication and may consider it when treating patients with a somewhat complicated postoperative course after surgery for Crohn's disease.

I recommend a publication in present form.
